RESEARCH ARTICLE

# Deformation of the Outer Hair Cells and the Accumulation of Caveolin-2 in Connexin 26 Deficient Mice

Takashi Anzai<sup>1</sup>, Ichiro Fukunaga<sup>1</sup>, Kaori Hatakeyama<sup>1</sup>, Ayumi Fujimoto<sup>1</sup>, Kazuma Kobayashi<sup>1</sup>, Atena Nishikawa<sup>1</sup>, Toru Aoki<sup>1</sup>, Tetsuo Noda<sup>2,3</sup>, Osamu Minowa<sup>3</sup>, Katsuhisa Ikeda<sup>1</sup>, Kazusaku Kamiya<sup>1\*</sup>

**1** Department of Otorhinolaryngology, Juntendo University Faculty of Medicine, Tokyo 113–8421, Japan, **2** Department of Cell Biology, Japanese Foundation for Cancer Research, Cancer Institute, Tokyo 135–8550, Japan, **3** Team for Advanced Development and Evaluation of Human Disease Models, RIKEN BioResource Center, Tsukuba 305–0074, Japan

\* [kkamiya@juntendo.ac.jp](mailto:kkamiya@juntendo.ac.jp)

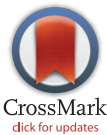

OPEN ACCESS

**Citation:** Anzai T, Fukunaga I, Hatakeyama K, Fujimoto A, Kobayashi K, Nishikawa A, et al. (2015) Deformation of the Outer Hair Cells and the Accumulation of Caveolin-2 in Connexin 26 Deficient Mice. PLoS ONE 10(10): e0141258. doi:10.1371/journal.pone.0141258

**Editor:** Alexandre Hiroaki Kihara, Universidade Federal do ABC, BRAZIL

**Received:** August 14, 2015

**Accepted:** October 6, 2015

**Published:** October 22, 2015

**Copyright:** © 2015 Anzai et al. This is an open access article distributed under the terms of the [Creative Commons Attribution License](https://creativecommons.org/licenses/by/4.0/), which permits unrestricted use, distribution, and reproduction in any medium, provided the original author and source are credited.

**Data Availability Statement:** All relevant data are within the paper.

**Funding:** This work was supported in part by JSPS KAKENHI grant number 25462653 (to K Kamiya) and grant number 25293351 (to KI), Ministry of Health, Labor and Welfare of Japan (to K Kamiya), MEXT-support program for the Strategic Research Foundation at Private Universities, 2011–2015 (to KI), the Research on Intractable Diseases from Japan Agency for Medical Research and development, AMED (to K Kamiya) and Takeda science foundation (to K Kamiya). The funders had no role in study

## Abstract

### Background

Mutations in *GJB2*, which encodes connexin 26 (Cx26), a cochlear gap junction protein, represent a major cause of pre-lingual, non-syndromic deafness. The degeneration of the organ of Corti observed in Cx26 mutant—associated deafness is thought to be a secondary pathology of hearing loss. Here we focused on abnormal development of the organ of Corti followed by degeneration including outer hair cell (OHC) loss.

### Methods

We investigated the crucial factors involved in late-onset degeneration and loss of OHC by ultrastructural observation, immunohistochemistry and protein analysis in our Cx26-deficient mice (Cx26<sup>ff</sup>P0Cre).

### Results

In ultrastructural observations of Cx26<sup>ff</sup>P0Cre mice, OHCs changed shape irregularly, and several folds or notches were observed in the plasma membrane. Furthermore, the mutant OHCs had a flat surface compared with the characteristic wavy surface structure of OHCs of normal mice. Protein analysis revealed an increased protein level of caveolin-2 (CAV2) in Cx26<sup>ff</sup>P0Cre mouse cochlea. In immunohistochemistry, a remarkable accumulation of CAV2 was observed in Cx26<sup>ff</sup>P0Cre mice. In particular, this accumulation of CAV2 was mainly observed around OHCs, and furthermore this accumulation was observed around the shrunken site of OHCs with an abnormal hourglass-like shape.

### Conclusions

The deformation of OHCs and the accumulation of CAV2 in the organ of Corti may play a crucial role in the progression of, or secondary OHC loss in, *GJB2*-associated deafness.

design, data collection and analysis, decision to publish, or preparation of the manuscript.

**Competing Interests:** The authors have declared that no competing financial interests exist.

Investigation of these molecular pathways, including those involving CAV2, may contribute to the elucidation of a new pathogenic mechanism of *GJB2*-associated deafness and identify effective targets for new therapies.

## Introduction

Hereditary deafness is one of the most common congenital diseases. [1, 2]. Approximately one in 1000 children is affected by severe hearing loss at birth or during early childhood, which is defined as pre-lingual deafness [3, 4], with approximately half of these cases attributable to genetic causes [5]. Among the >100 known forms of non-syndromic deafness with identified genetic loci, by far the most common and best characterized is the one associated with *GJB2* (OMIM 121011), the gene encoding connexin 26 (Cx26) [6]. We previously reported the generation of mouse models for Cx26-associated deafness and their molecular pathophysiology. We recently showed that the delayed programmed cell death observed in Cx26 mutant mice resulted in abnormal shapes for the organ of Corti [7], and mutation of Cx26 resulted in a drastic disruption and reduction in the gap junction plaque as well as an ion transport disorder. We also found that the corresponding upregulation and isoform shift of caveolin (CAV) may underlie these disruptions [8]. It has been reported that histopathologic evaluation of the human temporal bone in Cx26-related hearing loss revealed near-total degeneration of hair cells in the organ of Corti [9]. Both a Cx26 dominant-negative model and a conditional knockout model developed secondary degeneration [10–13], which could be rescued by gene transfer with wild-type *Gjb2* [14]. The mechanism underlying secondary outer hair cell (OHC) degeneration remains unknown. Because the mammalian inner ear largely lacks the capacity to regenerate OHCs [15], the mutant Cx26-associated degeneration leads to irreversible hearing loss. Even if certain therapies, drugs, or a superior cochlear implant is developed for Cx26-associated deafness, these irreversible changes may counter any attempt to treat the hearing loss. Here we demonstrate the deformation of OHCs in mice with Cx26-associated hearing loss and investigate the factors that contribute to the secondary degeneration of OHCs.

## Materials and Methods

### Animals and ethics statement

The care, maintenance, and treatment of animals in these studies followed protocols approved by the Institutional Animal Care and Use Committee at Juntendo University (Permit Number: 270201).

As we previously reported [8], otic vesicle-specific Cx26 knockout mice were generated by breeding Cx26<sup>fl/fl</sup> mice with mice that expressed the Cre recombinase gene under the control of the P0 gene promoter (P0Cre mice on the C57BL/6J background). Cx26<sup>fl/fl</sup> on a C57Bl/6J background in littermates was always used as the control for the Cx26<sup>fl/fl</sup>/P0Cre mice. Mouse genotypes were verified via polymerase chain reaction. To the extent possible, we minimized the number of animals used and their suffering.

### Transmission electron microscopy

Animals were deeply anesthetized and perfused intracardially with phosphate-buffered saline, followed by 2% paraformaldehyde and 2% glutaraldehyde in cacodylate buffer. The cochlea were resected and flushed with the fixative for 2 h at room temperature. After washing, the

specimens were post-fixed for 1.5 h with 2% osmium tetroxide in phosphate buffer and then were dehydrated through a graded ethanol series and embedded in Epon. Horizontal sections of the surface of the cochlear membrane labyrinth were made, stained with uranyl acetate and lead citrate, and examined by electron microscopy (Model H-7700, Hitachi).

## Immunohistochemistry

Mice were anesthetized and killed, and inner-ear tissues were then removed. The cochleae were further dissected and fixed in 4% paraformaldehyde. Immunofluorescence staining with antibodies against CAV2 (mouse IgG; BD) and Prestin (goat IgG; Santa Cruz) along with DAPI (Vector Laboratories) was performed on whole-mount preparations of the carefully resected organ of Corti or cochlear cryosections (7  $\mu\text{m}$ ). We incubated the tissues in the antibody solutions for 1 h at room temperature after blocking with 2% bovine serum albumin in phosphate-buffered saline. Fluorescence confocal images were obtained with a LSM510-META confocal microscope (Carl Zeiss). CAV2 was labeled with Alexa 488 (mouse IgG; Life Technologies) and observed by confocal laser microscopy using a 488-nm laser. Prestin was labeled with Alexa 633 (mouse IgG; Life Technologies) and observed by confocal microscopy using a 633-nm laser. Some of the red signals in the figures reflect the pseudo-color of the Alexa 488 signal.

## Western blotting

Mouse cochlear proteins were extracted with T-PER<sup>®</sup> Tissue Protein Extraction Reagent (Thermo Scientific) from at least six cochleae that included the organ of Corti, lateral wall, and stria vascularis. The proteins were resolved by SDS-PAGE using mini-PROTEAN TGX gradient gels (4–20% polyacrylamide; Bio-Rad Laboratories, Inc.) and then transferred to a polyvinylidene difluoride membrane (Amersham Hybond-P; GE Healthcare). After blocking, each membrane was processed through sequential incubations with anti-CAV2 (1:500, Sigma Aldrich) and monoclonal anti- $\beta$ -actin (1:1500; Sigma Aldrich) with horseradish peroxidase—conjugated anti-rabbit or anti-mouse IgG (1:40,000; GE Healthcare) as the secondary antibody. Amersham ELC Prime Western Blotting Detection Reagent (GE Healthcare) was then used for visualization, and the signal was observed by Image Quant LAS 4000 (Fujifilm). Each experiment was carried at least three times. Densitometric analysis of band intensities was performed with Multi Gauge Ver3.2. The data were normalized to the corresponding  $\beta$ -actin levels and expressed relative to the amount present in each littermate control and were compared using the Student's *t*-test (Excel).

## Image reconstruction

Coronal images of OHCs were constructed using *z*-stacked confocal images with IMARIS software (Bitplane).

## Statistics

A one-tailed Student's *t*-test, with a significance criterion of  $P < 0.05$ , was used to compare numbers of cells or the level of CAV2 among samples.

## Results

In this study, we performed ultrastructural and protein analysis of cochlea tissue using Cx26<sup>fl/fl</sup>P0Cre mice to investigate the mechanism and factors contributing to secondary degeneration of OHCs.

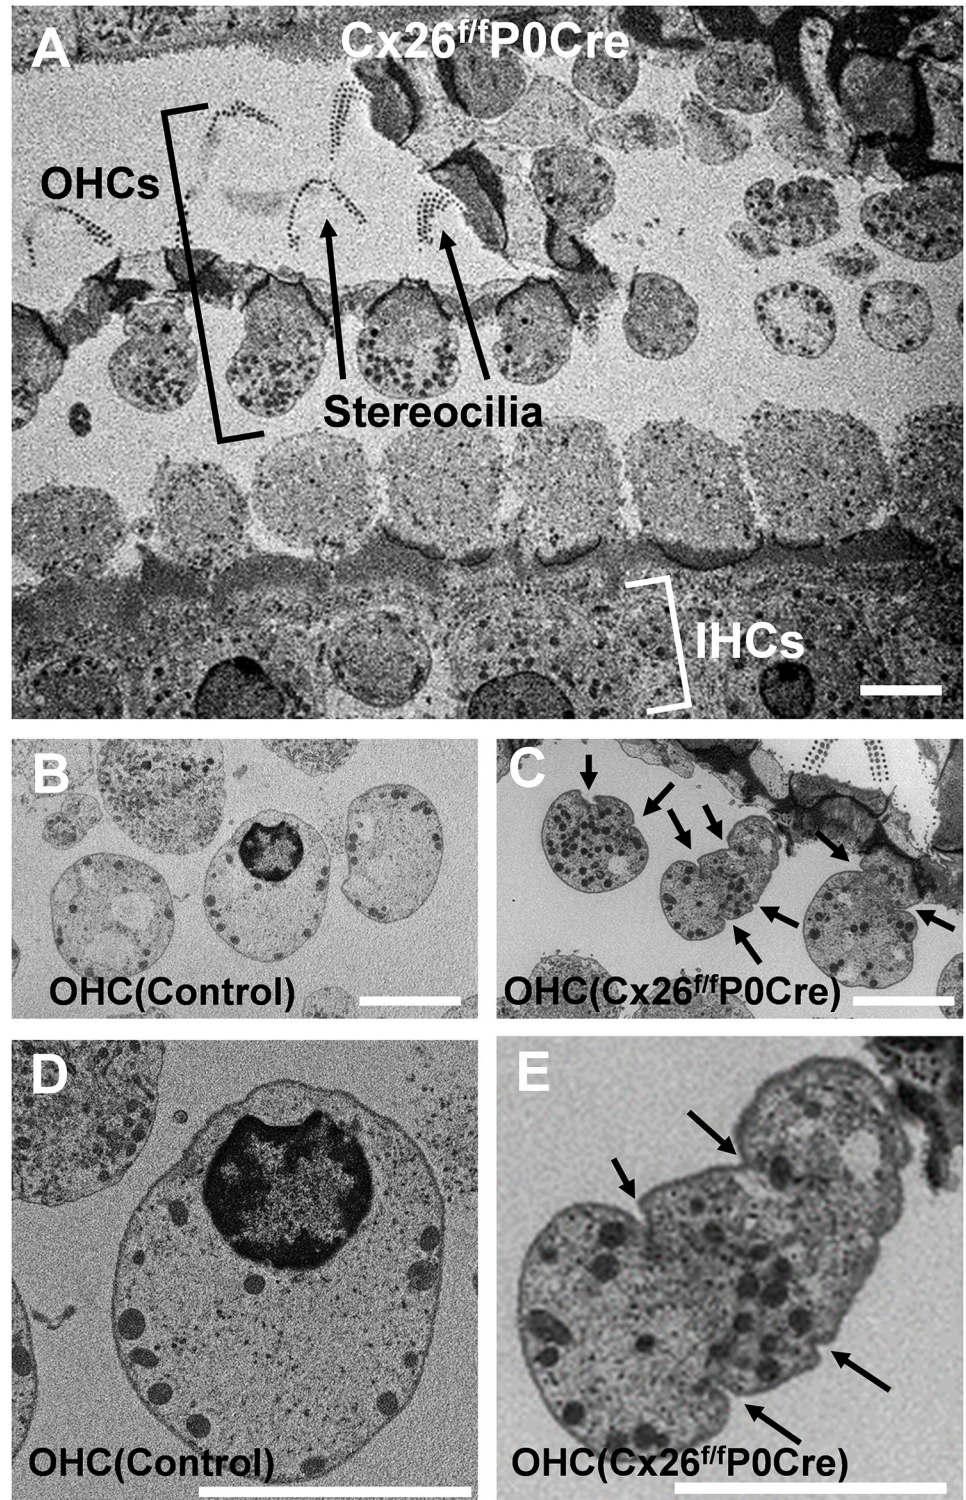

**Fig 1. Transmission electron micrographs of a horizontal section of OHCs.** Micrographs around apical part of cochlea of 5-week-old control (B, D) and Cx26<sup>fl/fl</sup>P0Cre (A, C, E) mice. Although, round-shaped OHCs were observed in control mice (B, D), deformed OHCs were observed in Cx26<sup>fl/fl</sup>P0Cre mice (A, C, E). OHCs in Cx26<sup>fl/fl</sup>P0Cre mice exhibited altered shapes, and several irregular folds or notches (arrows) were observed in the plasma membrane (C-E). Scale bars, 10  $\mu$ m. IHCs, inner hair cells; OHCs, outer hair cells.

doi:10.1371/journal.pone.0141258.g001

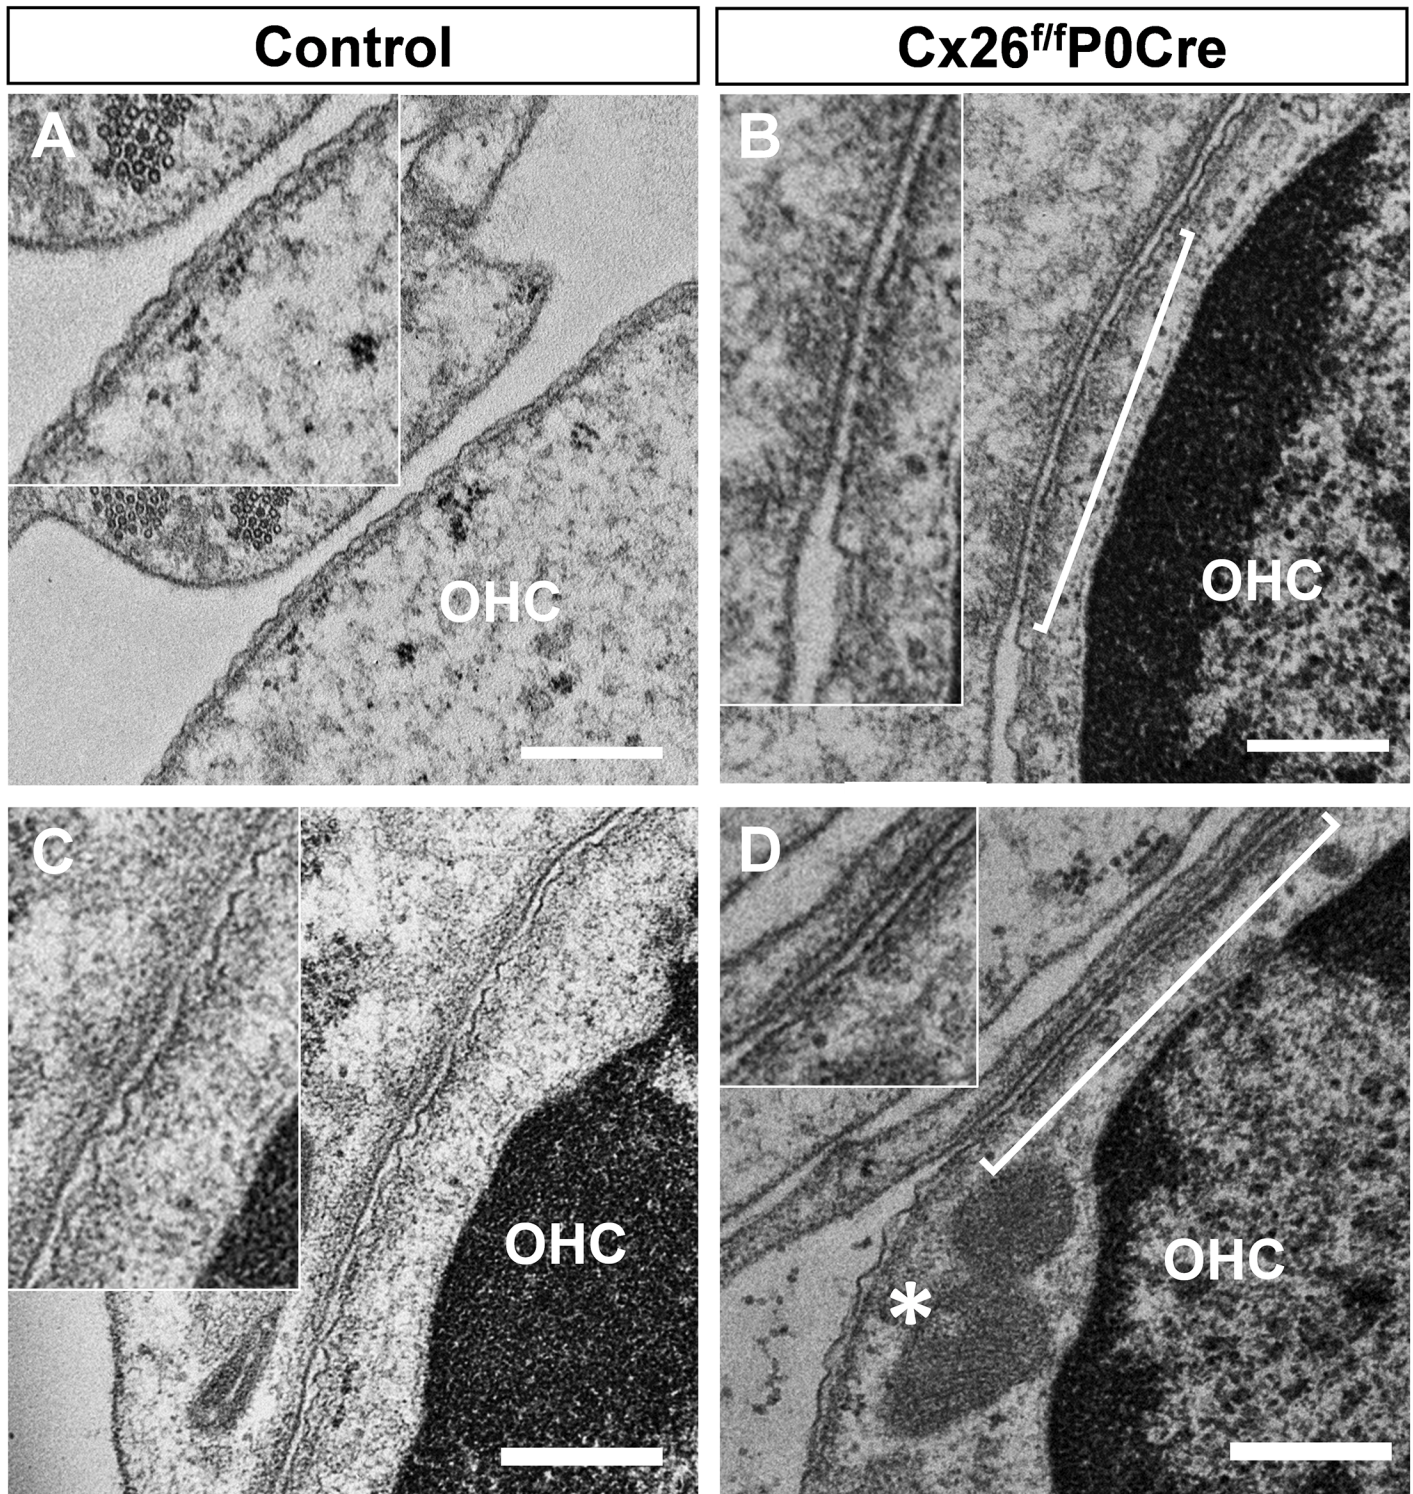

**Fig 2. Ultrastructure of the plasma membrane of OHCs.** Transmission electron micrographs of OHCs around apical part of cochlea in 5-week-old *Cx26<sup>fl/fl</sup>P0Cre* mice (B and D) and littermate controls (A and C). Horizontal ultrathin sections of the organ of Corti, including transverse section of OHCs, show the wavy surface of the plasma membrane that is thought to indicate the structure of the cortical lattice (A and C). In *Cx26<sup>fl/fl</sup>P0Cre* mice, a wavy surface structure was less apparent, and flat surfaces (brackets in B and D) were observed among the normal wavy surface regions of the plasma membrane (asterisk in D) at several points in OHCs. Scale bars, 500 nm. OHCs, outer hair cells.

doi:10.1371/journal.pone.0141258.g002

Horizontal ultrathin sections of the organ of Corti of 5-week-old Cx26<sup>fl/fl</sup>P0Cre with the control littermate are shown in Fig 1A. Although normal/round-shaped OHCs were observed in control mice (Fig 1B and 1D), OHC remarkable deformation was observed in Cx26<sup>fl/fl</sup>P0Cre mice (Fig 1C and 1E). The OHCs of control mice had a smooth plasma membrane (Fig 1B and 1D), whereas OHCs of Cx26<sup>fl/fl</sup>P0Cre mice had altered/irregular shapes, and several notches or folds were observed in the plasma membrane (arrows in Fig 1C and 1E). These deformations were detected in horizontal sections of OHCs, although they were never detected in our conventional mid-modiolar sections [16, 17].

A wavy cell surface, which is thought to indicate a normal cortical lattice, was observed by transmission electron microscopy of horizontal ultrathin sections focused on the ultrastructure of the plasma membrane of OHCs. In Cx26-deficient mice, however, the wavy surface structure of the OHC membrane was not always apparent and indeed a flat surface (bracket in Fig 2D) was observed at several places along the mutant OHC plasma membrane. As was the case for the above-mentioned OHC deformations, a mixed flat/wavy surface ultrastructure was

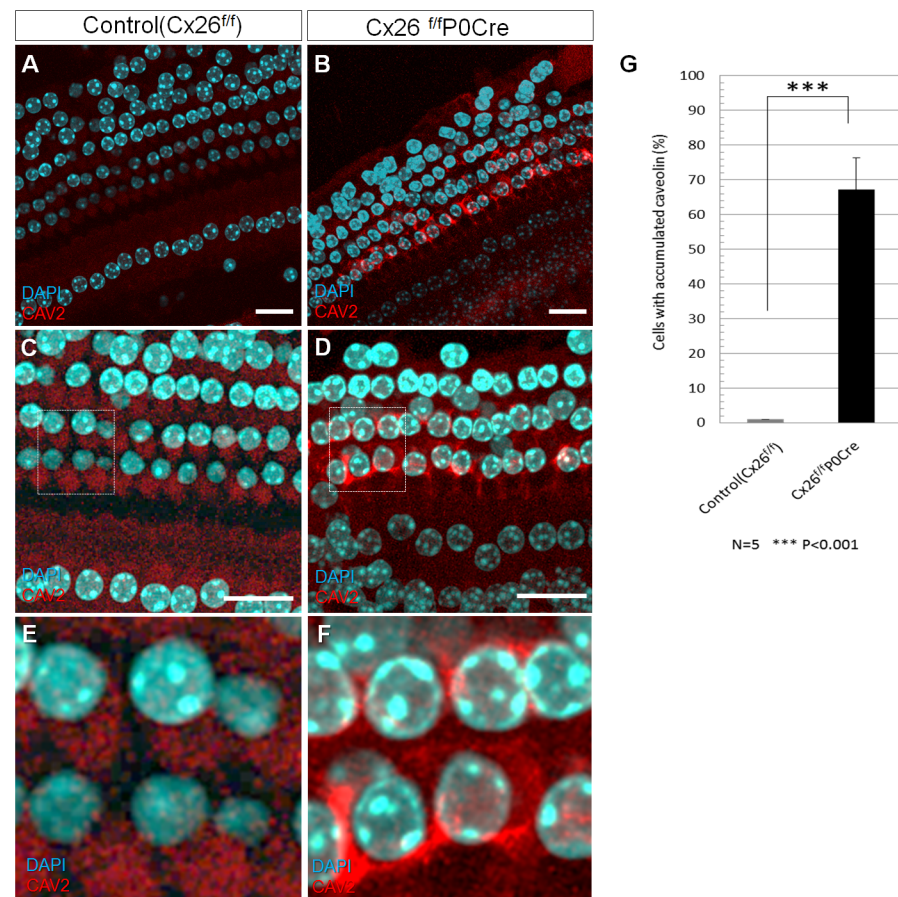

**Fig 3. CAV2 accumulation in the organ of Corti.** (A-F) Immunofluorescence staining for CAV2 in the organ of Corti around apical part of cochlea in 3-week-old Cx26<sup>fl/fl</sup>P0Cre mice with *GJB2*-associated deafness and in littermate controls. Whole-mount cochleae were fixed and immunolabeled with anti-CAV2 (red). Nuclei were counterstained with DAPI (blue). In contrast to the controls, notable accumulation of CAV2 was observed at the organ of Corti in Cx26<sup>fl/fl</sup>P0Cre cochleae. (G) shows the mean percentage of cells with accumulated CAV2 in control and Cx26<sup>fl/fl</sup>P0Cre cochleae. There was a statistically significant difference between the control and Cx26<sup>fl/fl</sup>P0Cre mice. Values represent the mean  $\pm$  SE (n = 5 mice). \*\*\*P = 3.72  $\times$  10<sup>-5</sup>, Student's *t*-test.

doi:10.1371/journal.pone.0141258.g003

detected only in horizontal sections of OHCs, and this was never detected in our conventional mid-modiolar sections [16, 17].

We investigated the factors contributing to the observed deformation of OHCs and the secondary degeneration at the organ of Corti of *Cx26<sup>ff</sup>/P0Cre* mice. After several protein analysis of mutant cochlea from these mice, we found increased expression and abnormal localization of CAV2 in the organ of Corti. Although, only diffuse labeling of CAV2 was observed in the organ of Corti of control mice (Fig 3A, 3C and 3E), accumulation of CAV2 was apparent in *Cx26<sup>ff</sup>/P0Cre* mice (Fig 3B, 3D and 3E). In particular, this accumulation was notable in OHCs, Deiter's cells, and pillar cells. Moreover, the number of cells exhibiting abnormal CAV2 accumulation was significantly greater in *Cx26<sup>ff</sup>/P0Cre* mice compared with control mice (Fig 3G).

To detect the lateral plasma membrane of OHCs, we utilized the OHC-specific protein prestin. In the reconstructed image of the mid-modiolar section, OHCs of *Cx26<sup>ff</sup>/P0Cre* mice had an altered, hourglass-like structure (Fig 4A and 4D), and CAV2 accumulated around the basolateral membranes (Fig 4D, 4E and 4F). In control OHCs, CAV2 localized diffusely in the cytoplasm (Fig 4A). In *Cx26<sup>ff</sup>/P0Cre* OHCs, however, accumulation of CAV2 was mainly observed around the shrunken site of OHCs (arrowheads in Fig 4D).

Fig 5 shows the immunolabeling for CAV2 in cryosections of the organ of Corti in 3-week-old control and *Cx26<sup>ff</sup>/P0Cre* mice. Although an open tunnel of Corti (TC) was observed in control mice (dotted line and arrow in Fig 5A), a closed TC was observed in *Cx26<sup>ff</sup>/P0Cre* mice (dotted line and arrow in Fig 5B). CAV2 accumulation, as shown in Figs 3 and 4, was also observed in cryosections of the organ of Corti. In particular, CAV2 accumulation was observed in cells surrounding the closed TC. (Fig 5B). In addition to our confocal analysis of CAV2

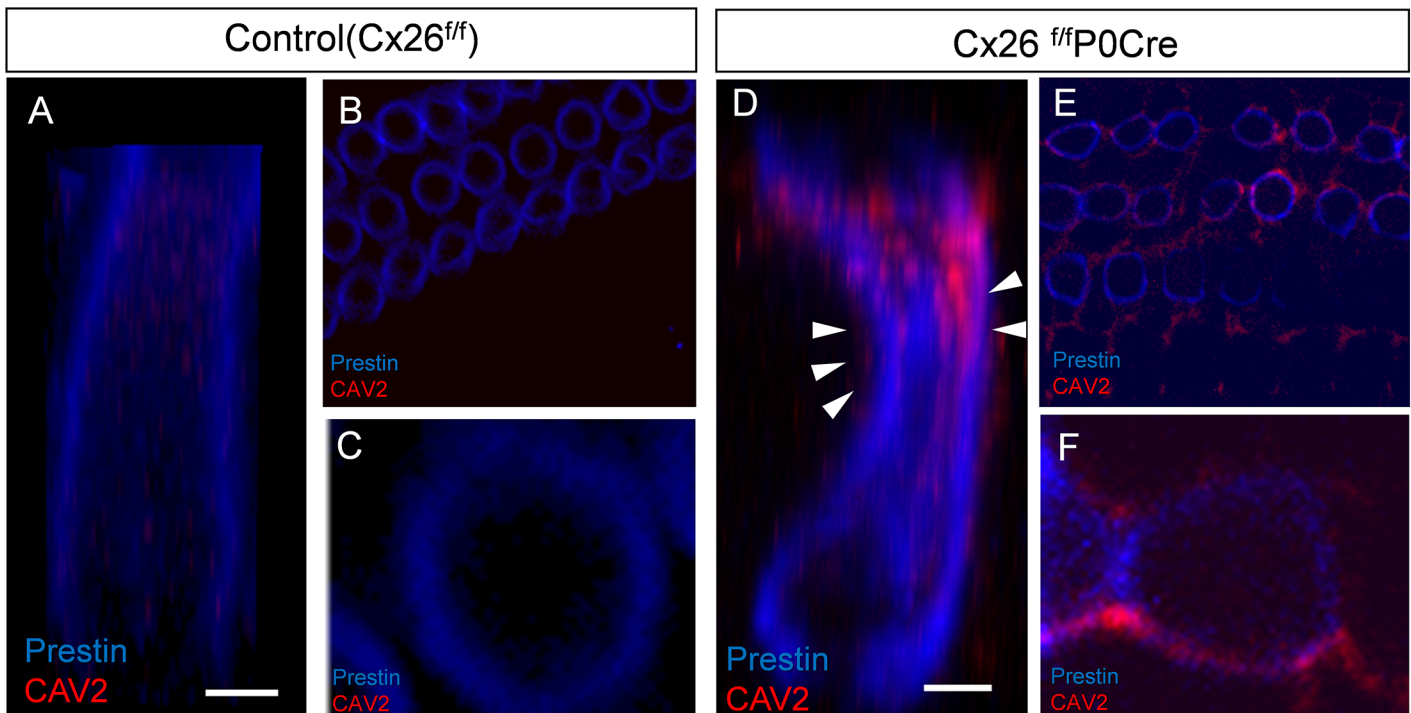

**Fig 4. Subcellular localization of CAV2 in OHCs.** Accumulation of CAV2 was observed in OHCs around apical part of cochlea and colocalized with prestin in 3-week-old control and *Cx26<sup>ff</sup>/P0Cre* mice. z-stacks of images were collected at 0.5- $\mu$ m intervals (B, C, E, F), and the images of OHCs were reconstructed with graphics software (A, D). Double labeling for CAV2 and prestin revealed that OHCs of *Cx26<sup>ff</sup>/P0Cre* mice had an altered, hourglass-like shape and that CAV2 accumulated near the basolateral plasma membranes. In contrast, CAV2 accumulation was mainly observed surrounding the shrunken site of OHCs in *Cx26<sup>ff</sup>/P0Cre* mice (arrowheads in D). OHCs, outer hair cells.

doi:10.1371/journal.pone.0141258.g004

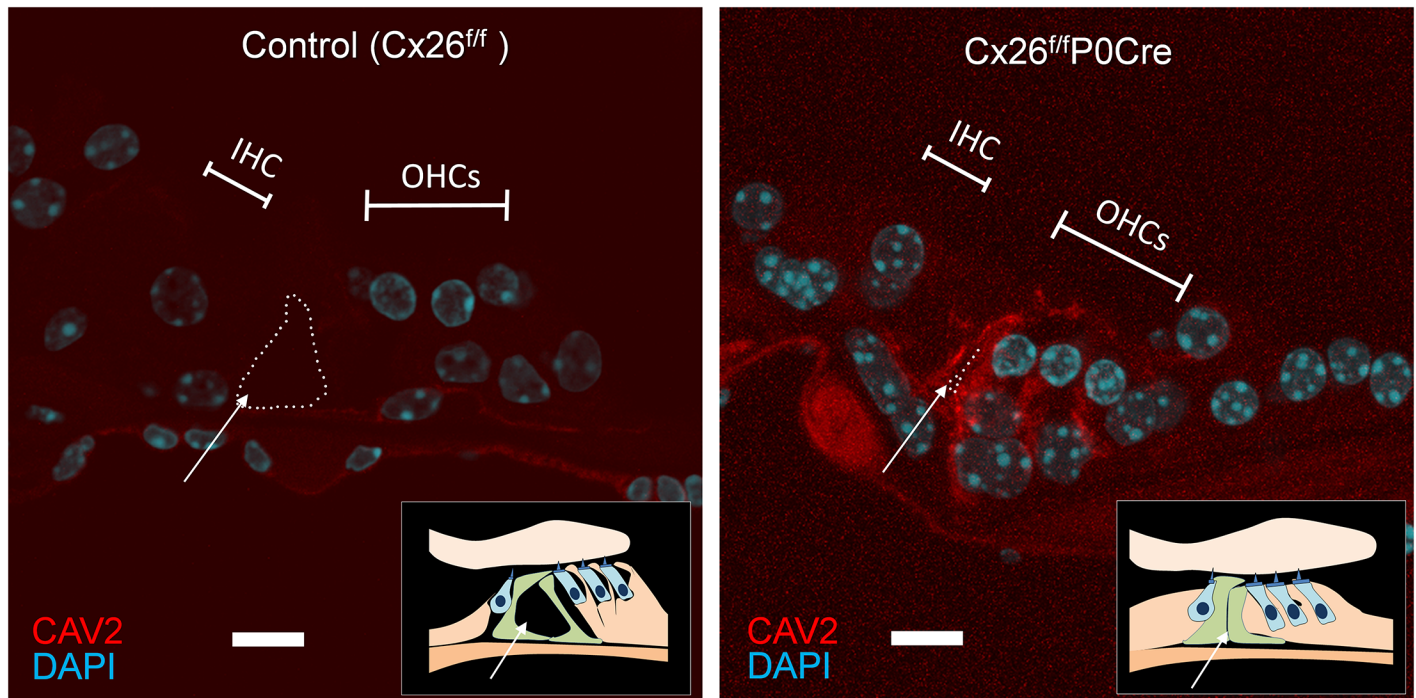

**Fig 5. Immunolabeling of CAV2 in cryosections of the organ of Corti in 3-week-old control and  $Cx26^{f/f}$ P0-Cre mice.** Cryosections of the organ of Corti around apical part of cochlea were immunolabeled with anti-CAV2 (red). Nuclei were counterstained with DAPI (blue). In contrast to the controls, the TC (dotted line with an arrow) was closed, and notable accumulation of CAVs was observed in OHCs and supporting cells. In particular, such accumulation was observed in cells surrounding the closed TC in  $Cx26^{f/f}$ P0Cre cochleae. Scale bars, 10  $\mu$ m. IHC, inner hair cell; OHCs, outer hair cells; TC, tunnel of Corti.

doi:10.1371/journal.pone.0141258.g005

localization in the organ of Corti, western blotting revealed that the CAV2 level was significantly greater in  $Cx26^{f/f}$ P0Cre mice (1.8-fold) compared with control mice (Fig 6).

## Discussion

Our results demonstrate the deformation of OHCs in  $Cx26$ -deficient mice using unconventional horizontal sections. It is thought that the overall cyto-architecture of the organ of Corti is essential for normal hearing. In our previous work, we showed that developmentally essential apoptosis in the organ of Corti was delayed in  $Cx26$  mutant mice [7]. Moreover, several studies have demonstrated that mutation of  $Cx26$  arrests TC development [16–19], which is thought to be associated with hearing loss. These studies show that disruption of the cyto-architecture of the organ of Corti may cause the deformation of OHCs. Moreover, the characteristic wavy surface structure of the plasma membrane of normal OHCs, which was thought to indicate cortical lattice (Fig 2), was not observed partially in OHCs of  $Cx26^{f/f}$ P0Cre mice. We speculate that alteration of the structure of the cortical lattice may underlie the observed deformation of OHCs in our  $Cx26^{f/f}$ P0Cre mice (Fig 1). We previously reported that OHCs are compressed and squeezed by the surrounding supporting cells in  $Cx26$  mutant mice [17]. These mechanical forces may reduce the wavy structure and result in a flat plasma membrane. The cortical lattice may regulate OHC stiffness and/or electromotility [20–24]. We reported that distortion-product otoacoustic emission could not be detected throughout development of  $Cx26$  dominant-negative model mice [17]. It is thought that mechanical stress and abnormal cyto-architecture suppress the distortion-product otoacoustic emission response and cause substantial damage to OHCs [17]. This may ultimately lead to the degeneration of secondary OHCs in  $Cx26^{f/f}$ P0Cre mice.



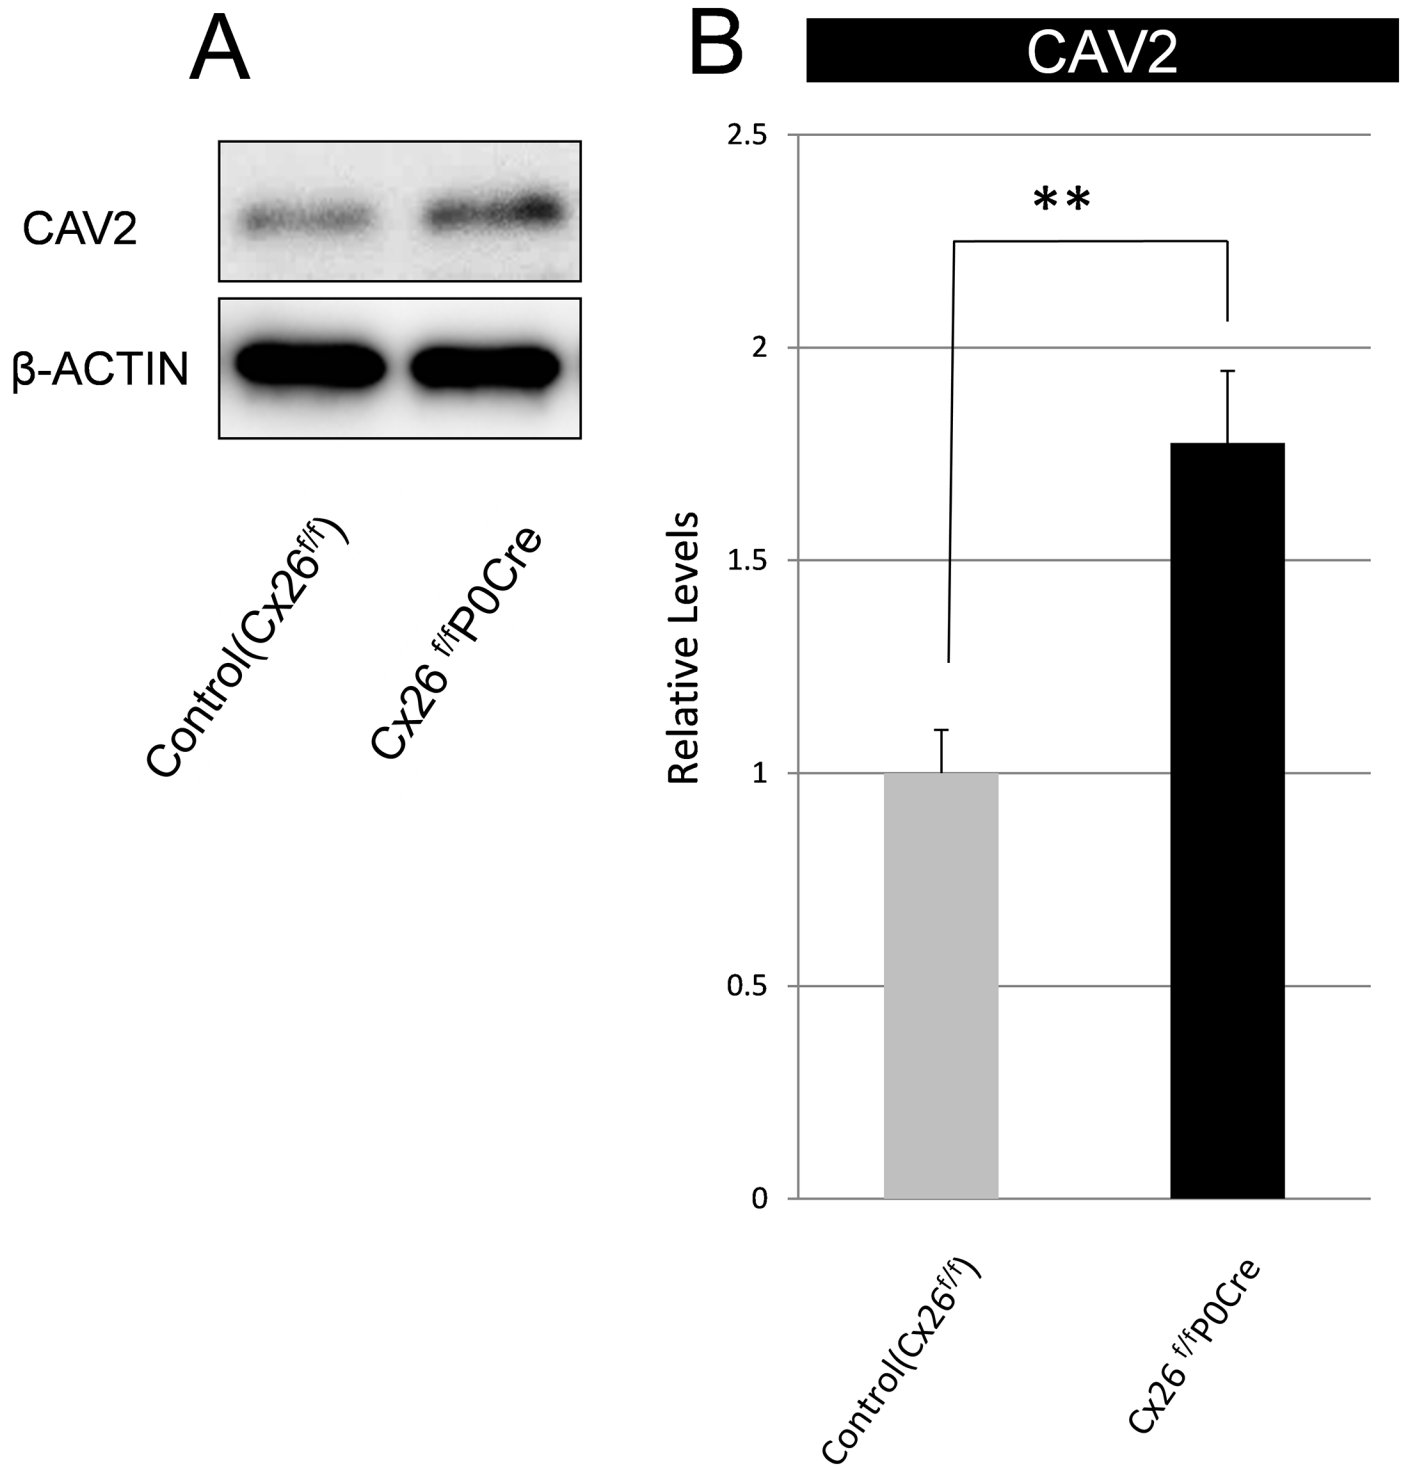

**Fig 6. Protein expression level of CAV2.** (A) Western blotting revealed an increase in CAV2 level in Cx26<sup>fl/fl</sup>P0Cre mice at postnatal day 21. (B) CAV level was normalized to that of  $\beta$ -actin and is expressed as relative to the amount present in each littermate control. Values represent the mean  $\pm$  SE (n = 6 for control, n = 5 for Cx26<sup>fl/fl</sup>P0Cre). \*\*P =  $2.5 \times 10^{-3}$  for CAV2, Student's *t*-test.

doi:10.1371/journal.pone.0141258.g006

CAVs are integral plasma-membrane proteins and the principal structural components of the localized caveolae membrane and related to endocytosis, cholesterol transport, and various signal transduction processes [25]. Recent experiments have shown that overexpression or abnormal localization of CAVs delays wound healing or accelerates cellular aging in several organs (e.g., skin [26, 27], lung [28], heart [29], and eye [30]). Among the three members of the caveolin family (CAV1, CAV2 and CAV3), CAV1 and CAV2 are expressed in most cell types. CAV3 is only expressed muscle cells [31, 32]. A recent study revealed that CAV2 is the key protein that regulates cell proliferation [33]. The CAV family is thought to be one of the stress-induced protein families, and CAVs negatively regulate cell proliferation and cell cycle progression [34]. It was also reported that CAV1 and CAV2 levels are elevated in endothelial cells in a mouse model of traumatic brain injury [35]. Furthermore, shear stress causes translocation of CAV1 from caveolae to noncaveolae sites and induces ERK activation [29]. In our current study, notable accumulation of CAV2 was observed in OHCs and supporting cells in *Cx26<sup>fl/fl</sup>P0Cre* mice. In particular, this accumulation was observed in cells near the closed TC (Fig 5B) and the shrunken site of OHCs (Fig 4D). These facts indicate OHCs and supporting cell were received some mechanical stress and the OHC secondary degeneration might be associated with CAV2. These facts may suggest that, as a consequence of CAV2 accumulation, the OHCs experienced secondary degeneration.

This is the first report demonstrating the characteristic deformation of OHCs and the identification of certain factors that contribute to OHC degeneration in the organ of Corti of *Cx26<sup>fl/fl</sup>P0Cre* OR *Cx26* mutant mice. Our study also suggests that CAVs in the organ of Corti may play a crucial role in the progression or secondary pathogenesis of *GJB2*-associated deafness. It has been reported that CAVs polymorphisms are associated with the risk of Meniere's disease, which is a disease of the inner ear that manifests as episodic vertigo [36]. CAVs may be important for inner-ear homeostasis. Investigation of these molecular pathways, including those involving CAV2, may contribute to our understanding of the pathogenesis of *GJB2*-associated deafness and provide new information on effective targets for new therapies.

## Acknowledgments

We thank M. Yoshida for help with transmission electron microscopy, K. Karasawa and Y. Furuta for experimental assistance.

## Author Contributions

Conceived and designed the experiments: K. Kamiya. Performed the experiments: T. Anzai IF AF AN T. Aoki K. Kobayashi K. Kamiya. Analyzed the data: T. Anzai K. Kamiya. Contributed reagents/materials/analysis tools: OM TN KI. Wrote the paper: T. Anzai K. Kamiya.

## References

1. Chan DK, Schrijver I, Chang KW. Connexin-26-associated deafness: phenotypic variability and progression of hearing loss. *Genetics in medicine: official journal of the American College of Medical Genetics*. 2010; 12(3):174–81. doi: [10.1097/GIM.0b013e3181d0d42b](https://doi.org/10.1097/GIM.0b013e3181d0d42b) PMID: [20154630](https://pubmed.ncbi.nlm.nih.gov/20154630/).
2. Mason JA, Herrmann KR. Universal infant hearing screening by automated auditory brainstem response measurement. *Pediatrics*. 1998; 101(2):221–8. PMID: [9445495](https://pubmed.ncbi.nlm.nih.gov/9445495/).
3. Petersen MB, Willems PJ. Non-syndromic, autosomal-recessive deafness. *Clinical genetics*. 2006; 69(5):371–92. doi: [10.1111/j.1399-0004.2006.00613.x](https://doi.org/10.1111/j.1399-0004.2006.00613.x) PMID: [16650073](https://pubmed.ncbi.nlm.nih.gov/16650073/).
4. Morton NE. Genetic epidemiology of hearing impairment. *Annals of the New York Academy of Sciences*. 1991; 630:16–31. PMID: [1952587](https://pubmed.ncbi.nlm.nih.gov/1952587/).
5. Birkenhager R, Lublinghoff N, Prera E, Schild C, Aschendorff A, Arndt S. Autosomal dominant prelingual hearing loss with palmoplantar keratoderma syndrome: Variability in clinical expression from

- mutations of R75W and R75Q in the GJB2 gene. *American journal of medical genetics Part A*. 2010; 152A(7):1798–802. doi: [10.1002/ajmg.a.33464](https://doi.org/10.1002/ajmg.a.33464) PMID: [20583176](https://pubmed.ncbi.nlm.nih.gov/20583176/).
6. Kelsell DP, Dunlop J, Stevens HP, Lench NJ, Liang JN, Parry G, et al. Connexin 26 mutations in hereditary non-syndromic sensorineural deafness. *Nature*. 1997; 387(6628):80–3. doi: [10.1038/387080a0](https://doi.org/10.1038/387080a0) PMID: [9139825](https://pubmed.ncbi.nlm.nih.gov/9139825/).
  7. Inoshita A, Karasawa K, Funakubo M, Miwa A, Ikeda K, Kamiya K. Dominant negative connexin26 mutation R75W causing severe hearing loss influences normal programmed cell death in postnatal organ of Corti. *BMC genetics*. 2014; 15:1. doi: [10.1186/1471-2156-15-1](https://doi.org/10.1186/1471-2156-15-1) PMID: [24387126](https://pubmed.ncbi.nlm.nih.gov/24387126/); PubMed Central PMCID: PMC3893426.
  8. Kamiya K, Yum SW, Kurebayashi N, Muraki M, Ogawa K, Karasawa K, et al. Assembly of the cochlear gap junction macromolecular complex requires connexin 26. *The Journal of clinical investigation*. 2014; 124(4):1598–607. doi: [10.1172/JCI67621](https://doi.org/10.1172/JCI67621) PMID: [24590285](https://pubmed.ncbi.nlm.nih.gov/24590285/); PubMed Central PMCID: PMC3973107.
  9. Jun AI, McGuire WT, Hinojosa R, Green GE, Fischel-Ghodsian N, Smith RJ. Temporal bone histopathology in connexin 26-related hearing loss. *The Laryngoscope*. 2000; 110(2 Pt 1):269–75. Epub 2000/02/19. doi: [10.1097/00005537-200002010-00016](https://doi.org/10.1097/00005537-200002010-00016) PMID: [10680928](https://pubmed.ncbi.nlm.nih.gov/10680928/).
  10. Kudo T, Kure S, Ikeda K, Xia AP, Katori Y, Suzuki M, et al. Transgenic expression of a dominant-negative connexin26 causes degeneration of the organ of Corti and non-syndromic deafness. *Human molecular genetics*. 2003; 12(9):995–1004. PMID: [12700168](https://pubmed.ncbi.nlm.nih.gov/12700168/).
  11. Cohen-Salmon M, Ott T, Michel V, Hardelin JP, Perfettini I, Eybalin M, et al. Targeted ablation of connexin26 in the inner ear epithelial gap junction network causes hearing impairment and cell death. *Current biology: CB*. 2002; 12(13):1106–11. Epub 2002/07/18. PMID: [12121617](https://pubmed.ncbi.nlm.nih.gov/12121617/); PubMed Central PMCID: PMC4030438.
  12. Wang Y, Chang Q, Tang W, Sun Y, Zhou B, Li H, et al. Targeted connexin26 ablation arrests postnatal development of the organ of Corti. *Biochemical and biophysical research communications*. 2009; 385(1):33–7. doi: [10.1016/j.bbrc.2009.05.023](https://doi.org/10.1016/j.bbrc.2009.05.023) PMID: [19433060](https://pubmed.ncbi.nlm.nih.gov/19433060/); PubMed Central PMCID: PMC2713729.
  13. Sun Y, Tang W, Chang Q, Wang Y, Kong W, Lin X. Connexin30 null and conditional connexin26 null mice display distinct pattern and time course of cellular degeneration in the cochlea. *The Journal of comparative neurology*. 2009; 516(6):569–79. doi: [10.1002/cne.22117](https://doi.org/10.1002/cne.22117) PMID: [19673007](https://pubmed.ncbi.nlm.nih.gov/19673007/); PubMed Central PMCID: PMC2846422.
  14. Iizuka T, Kamiya K, Gotoh S, Sugitani Y, Suzuki M, Noda T, et al. Perinatal Gjb2 gene transfer rescues hearing in a mouse model of hereditary deafness. *Human molecular genetics*. 2015; 24(13):3651–61. Epub 2015/03/25. doi: [10.1093/hmg/ddv109](https://doi.org/10.1093/hmg/ddv109) PMID: [25801282](https://pubmed.ncbi.nlm.nih.gov/25801282/).
  15. Edge AS, Chen ZY. Hair cell regeneration. *Current opinion in neurobiology*. 2008; 18(4):377–82. Epub 2008/10/22. doi: [10.1016/j.conb.2008.10.001](https://doi.org/10.1016/j.conb.2008.10.001) PMID: [18929656](https://pubmed.ncbi.nlm.nih.gov/18929656/).
  16. Inoshita A, Iizuka T, Okamura HO, Minekawa A, Kojima K, Furukawa M, et al. Postnatal development of the organ of Corti in dominant-negative Gjb2 transgenic mice. *Neuroscience*. 2008; 156(4):1039–47. doi: [10.1016/j.neuroscience.2008.08.027](https://doi.org/10.1016/j.neuroscience.2008.08.027) PMID: [18793701](https://pubmed.ncbi.nlm.nih.gov/18793701/).
  17. Minekawa A, Abe T, Inoshita A, Iizuka T, Kakehata S, Narui Y, et al. Cochlear outer hair cells in a dominant-negative connexin26 mutant mouse preserve non-linear capacitance in spite of impaired distortion product otoacoustic emission. *Neuroscience*. 2009; 164(3):1312–9. doi: [10.1016/j.neuroscience.2009.08.043](https://doi.org/10.1016/j.neuroscience.2009.08.043) PMID: [19712724](https://pubmed.ncbi.nlm.nih.gov/19712724/).
  18. Chen J, Chen J, Zhu Y, Liang C, Zhao HB. Deafness induced by Connexin 26 (GJB2) deficiency is not determined by endocochlear potential (EP) reduction but is associated with cochlear developmental disorders. *Biochemical and biophysical research communications*. 2014; 448(1):28–32. doi: [10.1016/j.bbrc.2014.04.016](https://doi.org/10.1016/j.bbrc.2014.04.016) PMID: [24732355](https://pubmed.ncbi.nlm.nih.gov/24732355/); PubMed Central PMCID: PMC4105360.
  19. Chen S, Sun Y, Lin X, Kong W. Down regulated connexin26 at different postnatal stage displayed different types of cellular degeneration and formation of organ of Corti. *Biochemical and biophysical research communications*. 2014; 445(1):71–7. Epub 2014/02/05. doi: [10.1016/j.bbrc.2014.01.154](https://doi.org/10.1016/j.bbrc.2014.01.154) PMID: [24491564](https://pubmed.ncbi.nlm.nih.gov/24491564/).
  20. Dallos P, He DZ, Lin X, Sziklai I, Mehta S, Evans BN. Acetylcholine, outer hair cell electromotility, and the cochlear amplifier. *The Journal of neuroscience: the official journal of the Society for Neuroscience*. 1997; 17(6):2212–26. PMID: [9045745](https://pubmed.ncbi.nlm.nih.gov/9045745/).
  21. Frolenkov GI, Mammano F, Belyantseva IA, Coling D, Kachar B. Two distinct Ca(2+)-dependent signaling pathways regulate the motor output of cochlear outer hair cells. *The Journal of neuroscience: the official journal of the Society for Neuroscience*. 2000; 20(16):5940–8. PMID: [10934241](https://pubmed.ncbi.nlm.nih.gov/10934241/).
  22. Kalinec F, Zhang M, Urrutia R, Kalinec G. Rho GTPases mediate the regulation of cochlear outer hair cell motility by acetylcholine. *The Journal of biological chemistry*. 2000; 275(36):28000–5. doi: [10.1074/jbc.M004917200](https://doi.org/10.1074/jbc.M004917200) PMID: [10862776](https://pubmed.ncbi.nlm.nih.gov/10862776/).

23. Zhang M, Kalinec GM, Urrutia R, Billadeau DD, Kalinec F. ROCK-dependent and ROCK-independent control of cochlear outer hair cell electromotility. *The Journal of biological chemistry*. 2003; 278(37):35644–50. doi: [10.1074/jbc.M301668200](https://doi.org/10.1074/jbc.M301668200) PMID: [12837763](https://pubmed.ncbi.nlm.nih.gov/12837763/).
24. Zelenskaya A, de Monvel JB, Pesen D, Radmacher M, Hoh JH, Ulfendahl M. Evidence for a highly elastic shell-core organization of cochlear outer hair cells by local membrane indentation. *Biophysical journal*. 2005; 88(4):2982–93. doi: [10.1529/biophysj.104.052225](https://doi.org/10.1529/biophysj.104.052225) PMID: [15653728](https://pubmed.ncbi.nlm.nih.gov/15653728/); PubMed Central PMCID: PMC1305392.
25. Boscher C, Nabi IR. Caveolin-1: role in cell signaling. *Advances in experimental medicine and biology*. 2012; 729:29–50. Epub 2012/03/14. doi: [10.1007/978-1-4614-1222-9\\_3](https://doi.org/10.1007/978-1-4614-1222-9_3) PMID: [22411312](https://pubmed.ncbi.nlm.nih.gov/22411312/).
26. Lee JA, Choi DI, Choi JY, Kim SO, Cho KA, Lee JB, et al. Methyl-beta-cyclodextrin up-regulates collagen I expression in chronologically-aged skin via its anti-caveolin-1 activity. *Oncotarget*. 2015; 6(4):1942–53. Epub 2015/01/13. PMID: [25575822](https://pubmed.ncbi.nlm.nih.gov/25575822/); PubMed Central PMCID: PMCPmc4385827.
27. Gassmann MG, Werner S. Caveolin-1 and -2 expression is differentially regulated in cultured keratinocytes and within the regenerating epidermis of cutaneous wounds. *Experimental cell research*. 2000; 258(1):23–32. doi: [10.1006/excr.2000.4904](https://doi.org/10.1006/excr.2000.4904) PMID: [10912784](https://pubmed.ncbi.nlm.nih.gov/10912784/).
28. Volonte D, Galbiati F. Caveolin-1, cellular senescence and pulmonary emphysema. *Aging*. 2009; 1(9):831–5. Epub 2010/02/17. PMID: [20157570](https://pubmed.ncbi.nlm.nih.gov/20157570/); PubMed Central PMCID: PMCPmc2815740.
29. Iwatsubo K, Tsunematsu T, Ishikawa Y. Isoform-specific regulation of adenylyl cyclase: a potential target in future pharmacotherapy. *Expert opinion on therapeutic targets*. 2003; 7(3):441–51. doi: [10.1517/14728222.7.3.441](https://doi.org/10.1517/14728222.7.3.441) PMID: [12783579](https://pubmed.ncbi.nlm.nih.gov/12783579/).
30. Rhim JH, Kim JH, Yeo EJ, Kim JC, Park SC. Caveolin-1 as a novel indicator of wound-healing capacity in aged human corneal epithelium. *Molecular medicine*. 2010; 16(11–12):527–34. doi: [10.2119/molmed.2010.00046](https://doi.org/10.2119/molmed.2010.00046) PMID: [20644900](https://pubmed.ncbi.nlm.nih.gov/20644900/); PubMed Central PMCID: PMC2972400.
31. Parton RG, Simons K. The multiple faces of caveolae. *Nature reviews Molecular cell biology*. 2007; 8(3):185–94. Epub 2007/02/24. doi: [10.1038/nrm2122](https://doi.org/10.1038/nrm2122) PMID: [17318224](https://pubmed.ncbi.nlm.nih.gov/17318224/).
32. Bastiani M, Parton RG. Caveolae at a glance. *Journal of cell science*. 2010; 123(Pt 22):3831–6. Epub 2010/11/05. doi: [10.1242/jcs.070102](https://doi.org/10.1242/jcs.070102) PMID: [21048159](https://pubmed.ncbi.nlm.nih.gov/21048159/).
33. Sowa G. Novel insights into the role of caveolin-2 in cell- and tissue-specific signaling and function. *Biochemistry research international*. 2011; 2011:809259. Epub 2012/01/10. doi: [10.1155/2011/809259](https://doi.org/10.1155/2011/809259) PMID: [22229094](https://pubmed.ncbi.nlm.nih.gov/22229094/); PubMed Central PMCID: PMCPmc3249596.
34. Xie L, Frank PG, Lisanti MP, Sowa G. Endothelial cells isolated from caveolin-2 knockout mice display higher proliferation rate and cell cycle progression relative to their wild-type counterparts. *American journal of physiology Cell physiology*. 2010; 298(3):C693–701. doi: [10.1152/ajpcell.00401.2009](https://doi.org/10.1152/ajpcell.00401.2009) PMID: [20007452](https://pubmed.ncbi.nlm.nih.gov/20007452/); PubMed Central PMCID: PMC2838569.
35. Badaut J, Ajao DO, Sorensen DW, Fukuda AM, Pellerin L. Caveolin expression changes in the neurovascular unit after juvenile traumatic brain injury: signs of blood-brain barrier healing? *Neuroscience*. 2015; 285:215–26. Epub 2014/12/03. doi: [10.1016/j.neuroscience.2014.10.035](https://doi.org/10.1016/j.neuroscience.2014.10.035) PMID: [25450954](https://pubmed.ncbi.nlm.nih.gov/25450954/); PubMed Central PMCID: PMCPmc4431593.
36. Teranishi M, Uchida Y, Nishio N, Kato K, Otake H, Yoshida T, et al. Polymorphisms in genes involved in the free-radical process in patients with sudden sensorineural hearing loss and Meniere's disease. *Free radical research*. 2013; 47(6–7):498–506. doi: [10.3109/10715762.2013.793319](https://doi.org/10.3109/10715762.2013.793319) PMID: [23560644](https://pubmed.ncbi.nlm.nih.gov/23560644/).
